# Supplementary material
Source: PubMed Central journal article supplement (PMC4378170)
Supplement: supp_pp.114.255943_255943Kong_Suppl_Rev.pdf [file supp_pp.114.255943_255943Kong_Suppl_Rev.pdf]

# Galactose-Depleted Xyloglucan is Dysfunctional and Leads to Dwarfism in Arabidopsis

Yingzhen Kong, Maria J. Peña, Luciana Renna, Utku Avci, Sivakumar Pattathil, Sami T. Tuomivaara, Xuemei Li, Wolf-Dieter Reiter, Federica Brandizzi, Michael G. Hahn, Alan G. Darvill, William S. York and Malcolm A. O'Neill

## SUPPORTING INFORMATION

**Figure S1.** RT-PCR analysis of gene transcripts in the mutant lines.

**Figure S2.** The MALDI-TOF mass spectra and HPAE-PAD profiles of the XyGOs generated by XEG treatment of the 4 N KOH soluble materials from Col-O, *mur3-1*, *mur3-2*, and *mur3-3* mutant plants.

**Figure S3.** The MALDI-TOF mass spectra and HPAE-PAD profiles of the XyGOs generated by XEG treatment of the 4 N KOH soluble materials from Col-O, *mur3*, *xxt*, and *mur3 xxt* mutant plants.

**Figure S4.** The phenotypes and MALDI-TOF mass spectra of the XyGOs generated by XEG treatment of the 4 N KOH soluble materials from individual *35Spro MUR3:mur3*, *mur3-1*, and *mur3-2* plants.

**Figure S5.** The MALDI-TOF mass spectra of the XyGOs released by XEG treatment of Col-O, *mur3-1*, *mur3-2*, and *mur3-3* AIR.

**Figure S6.** The effect of the absence of light on hypocotyls length of seedlings carrying single or combine mutations in genes encoding xylosyltransferases XXT1, XXT2, and XXT5 and galactosyltransferases MUR3 and XLT2.

**Figure S7.** RT-PCR analyses of *XLT2* transcripts in the rosette leaves of *mur3-3:35Spro:XLT2* plants.

**Figure S8.** Intracellular accumulation of cell wall polysaccharides in *mur3* hypocotyls.

**Figure S9.** The MALDI-TOF mass spectra and HPAE-PAD profiles of the XyGOs generated by XEG treatment of the 4 N KOH soluble materials from Col-O and selected mutant plants grown at 19 °C and 28°C.

**Figure S10.** The effects of temperature on the growth and development of *mur3-3* plants.

**Figure S11.** Abundance of tandemly repeated XXXG domains in the xyloglucan from transgenic plants.

**Table S1.** Sidechain compositions of the xyloglucans isolated from the cell walls of Arabidopsis wild-type, *mur3-1*, *mur3-2*, and *mur3-3* plants.

**Table S2.** The amounts and subunit compositions of the xyloglucan present in the leaf cell walls of wild type and selected *xxt* Arabidopsis mutants.

**Table S3.** Primers used in this study.

**Table S4.** Monoclonal antibodies used for glycome profiling.

**Protocol S1.** Calculating the fraction of a polysaccharide that is composed of domains containing *n* or more tandemly repeated copies of a sequence.

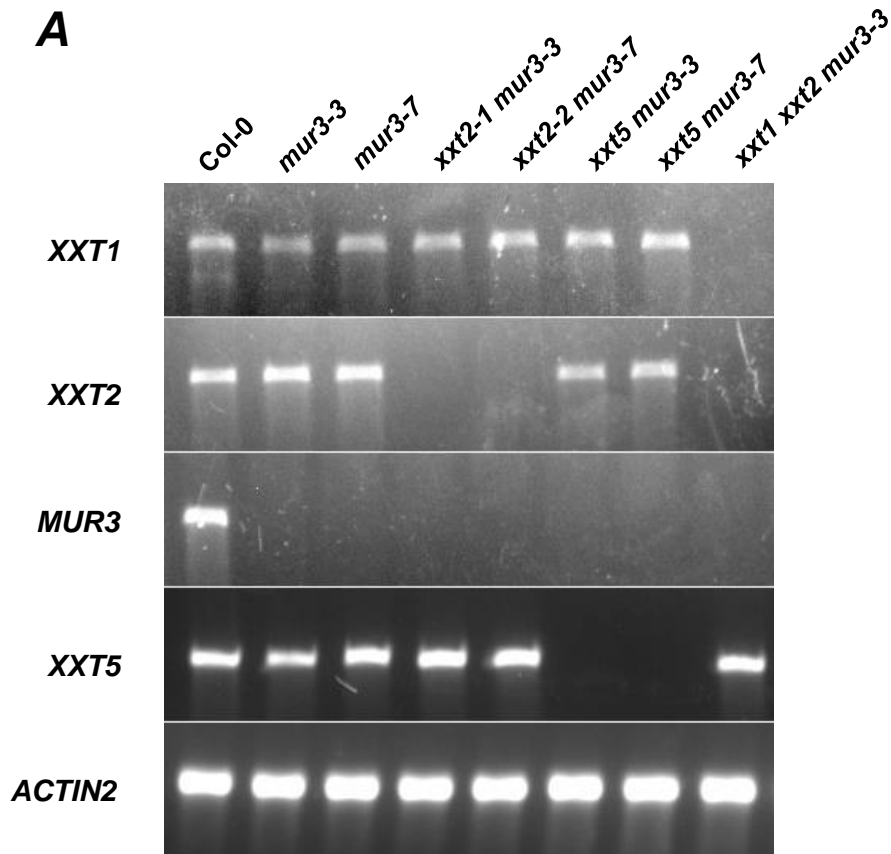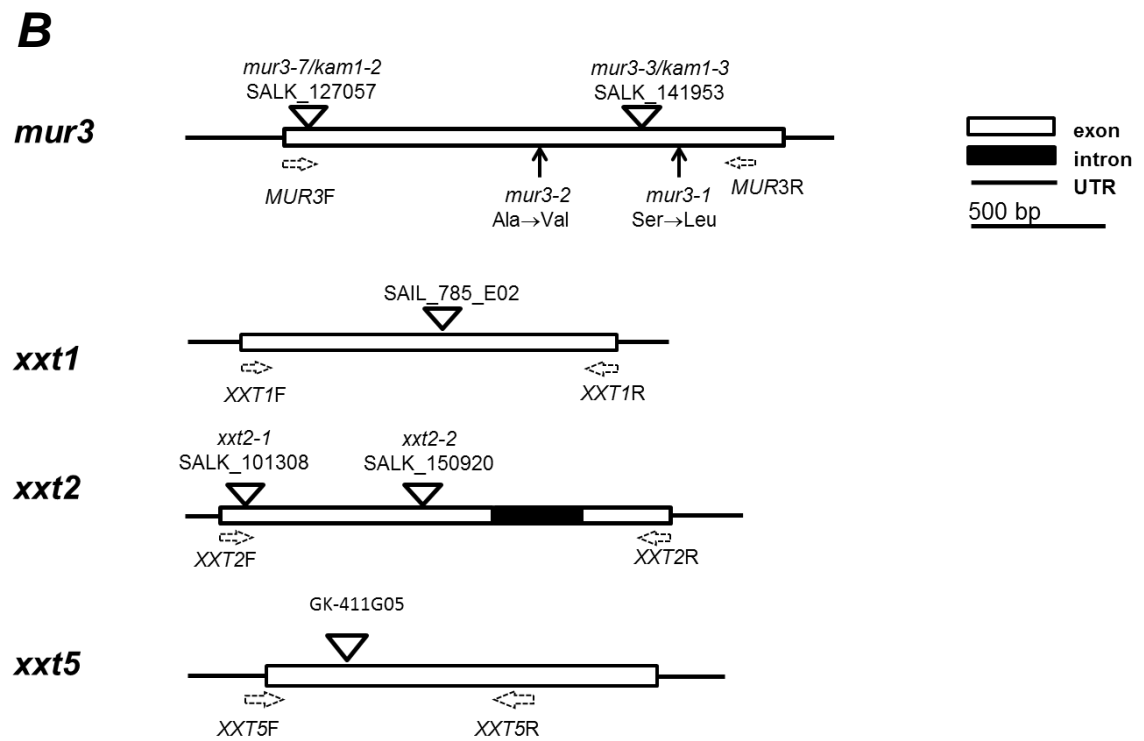

**Supplemental Figure S1.** RT-PCR analysis of gene transcripts in the mutant lines. A, RT-PCR analysis of gene transcripts in the rosette leaves of the mutant lines. Total RNA (2  $\mu$ g) was used for reverse transcription in a 20- $\mu$ L RT-PCR reaction. A portion (0.2  $\mu$ L) of the reverse transcription products was then used in a 20- $\mu$ L PCR reaction. Thirty cycles of PCR were used. Primers used are listed in Table S4. B, Location of the T-DNA insertions in the *mur3* and the *xxt1*, *xxt2*, and *xxt5* mutants.

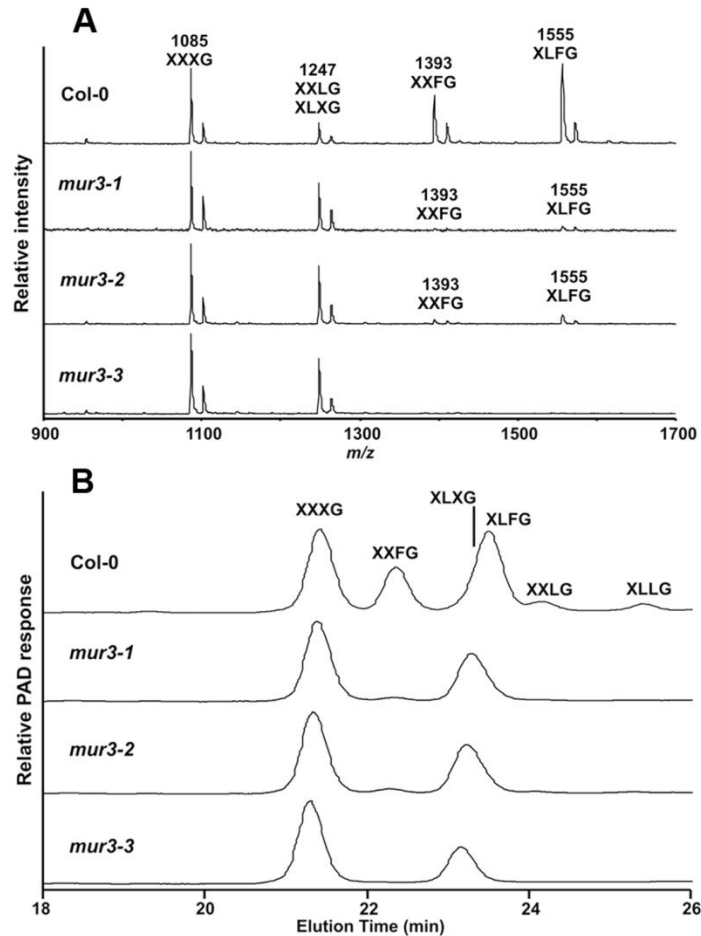

**Supplemental Figure S2.** The MALDI-TOF mass spectra and HPAE-PAD profiles of the XyGOs generated by XEG treatment of the 4 N KOH soluble materials from Col-0, *mur3-1*, *mur3-2*, and *mur3-3* mutant plants. A, The MALDI-TOF mass spectra of the xyloglucan oligosaccharides. B, The HPAE-PAD profiles of the xyloglucan oligosaccharides. XLXG elutes slightly before XLFG, but these subunits could not be separated.

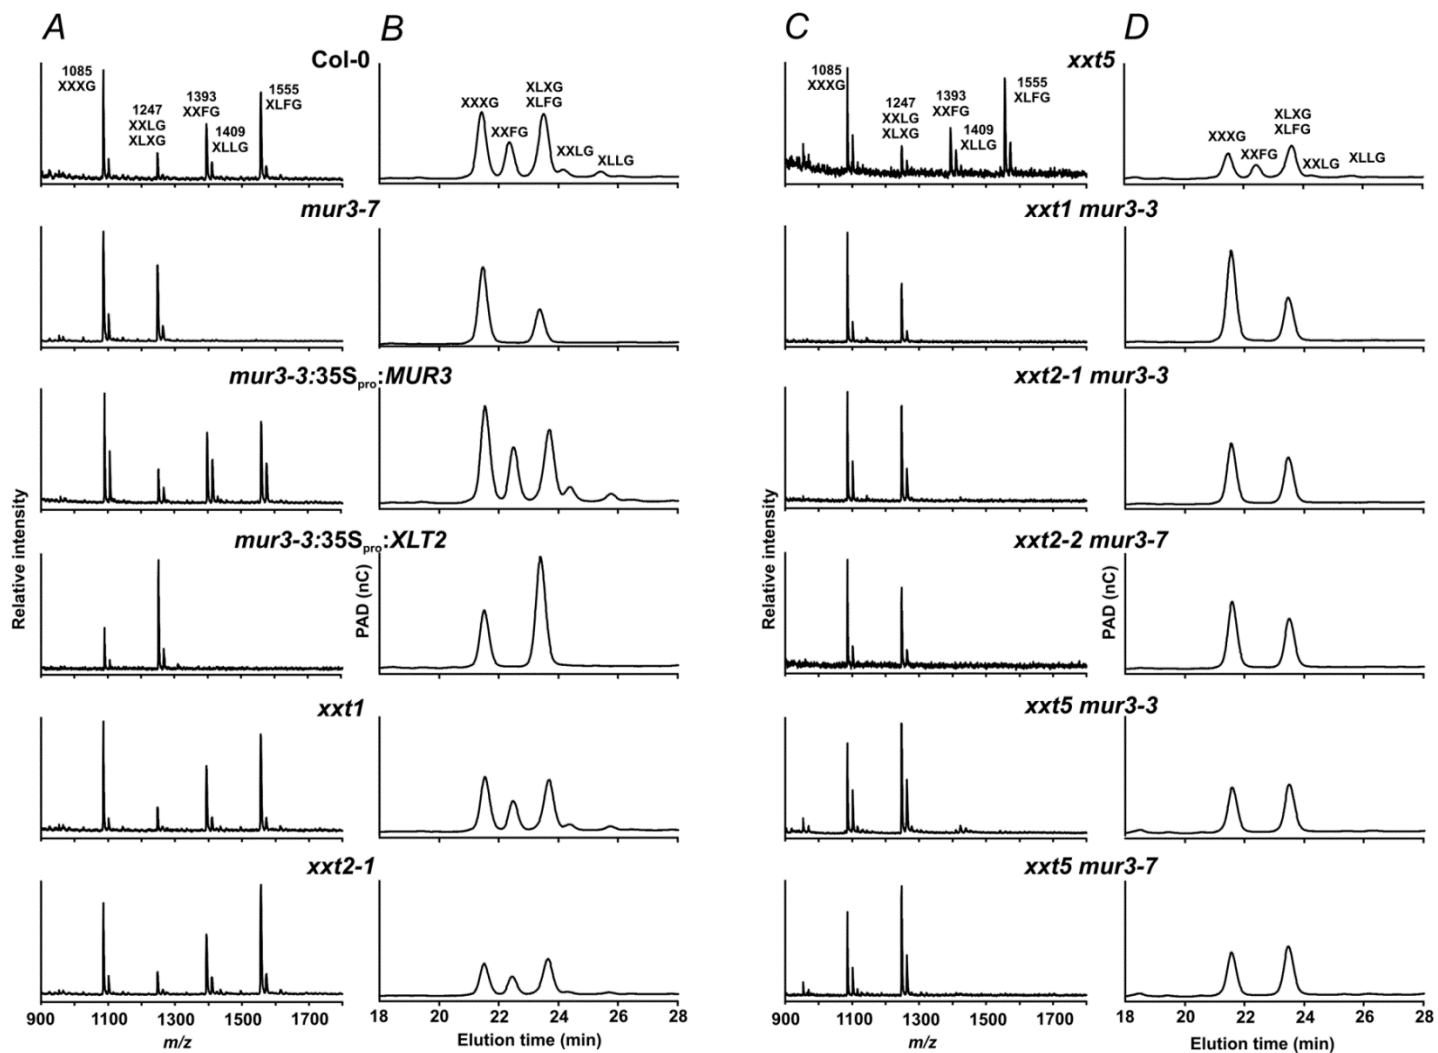

**Supplemental Figure S3.** The MALDI-TOF mass spectra and HPAE-PAD profiles of the XyGOs generated by XEG treatment of the 4 N KOH soluble materials from Col-O, *mur3*, *xtt*, and *mur3 xtt* mutant plants. A and C, The MALDI-TOF mass spectra of the XyGOs. B and D, The HPAE-PAD profiles of the XyGOs.

**$^{35}\text{S}_{\text{pro}}$  *MUR3:mur3-3***

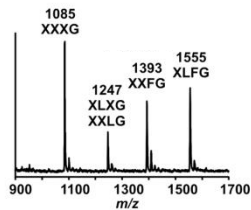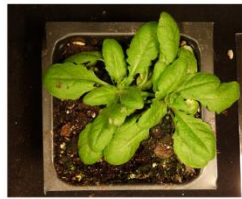

***mur3-1***

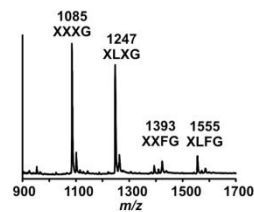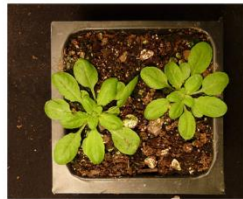

***mur3-2***

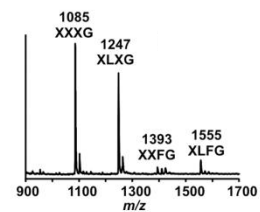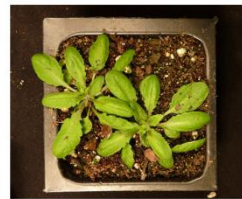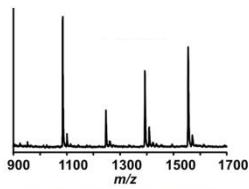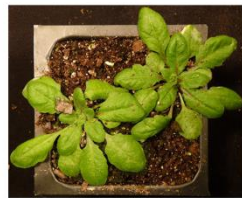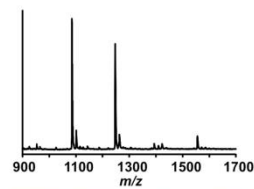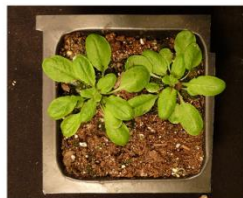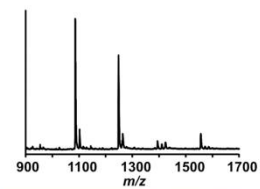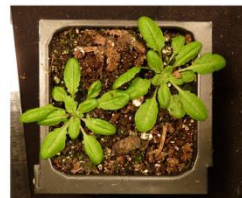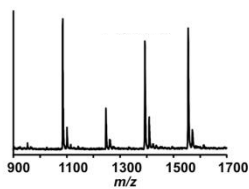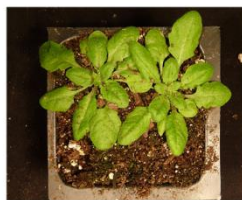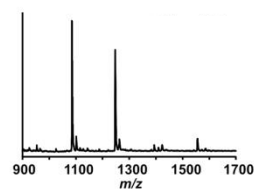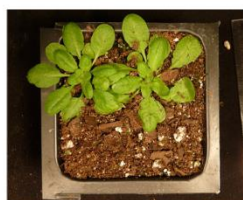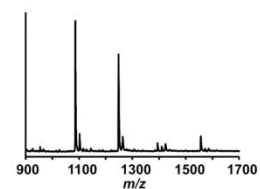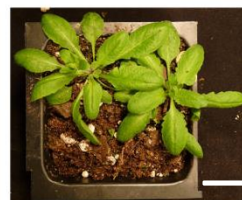

**Supplemental Figure S4.** The phenotypes and MALDI-TOF mass spectra of the XyGOs generated by XEG treatment of the 4 n KOH soluble materials from individual  $^{35}\text{S}_{\text{pro}}$  *MUR3:mur3*, *mur3-1*, and *mur3-2* plants. Each plant in a pot was separately analyzed but only one mass spectrum is shown. Scal bar = 2.5 cm

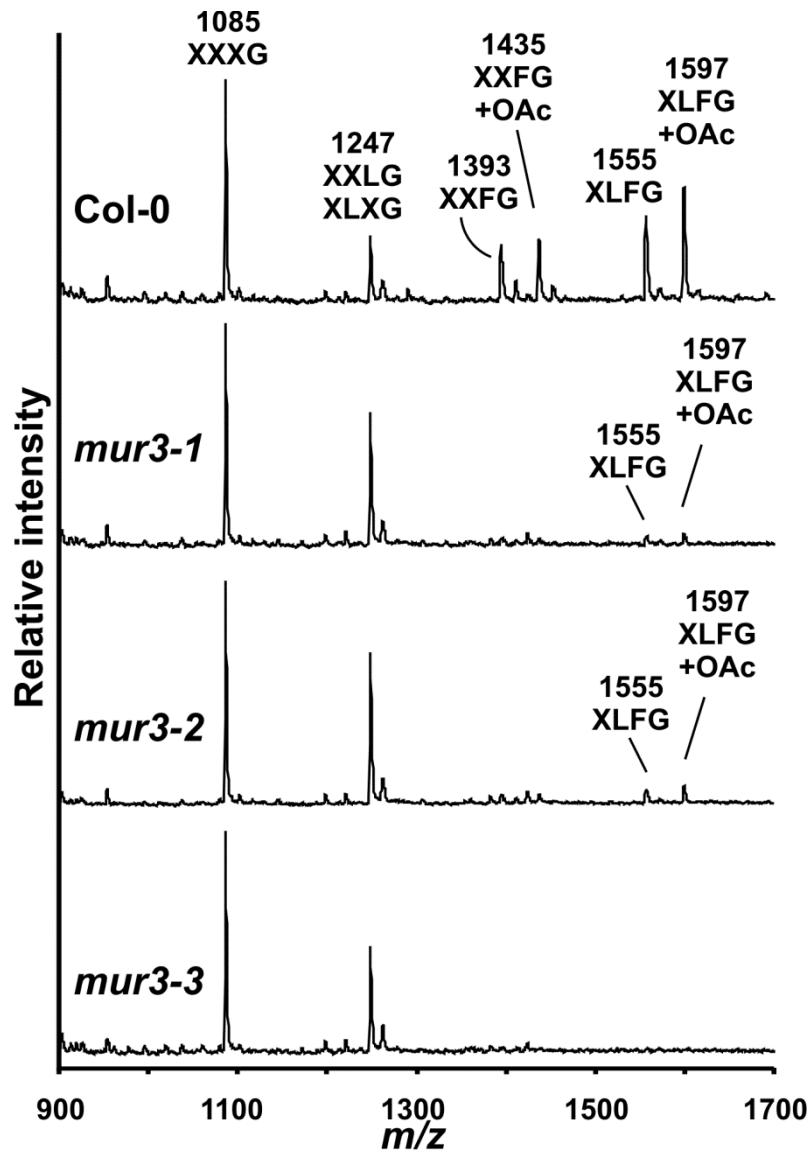

**Supplemental Figure S5.** The MALDI-TOF mass spectra of the XyGOs released by XEG treatment of Col-O, *mur3-1*, *mur3-2*, and *mur3-3* AIR.

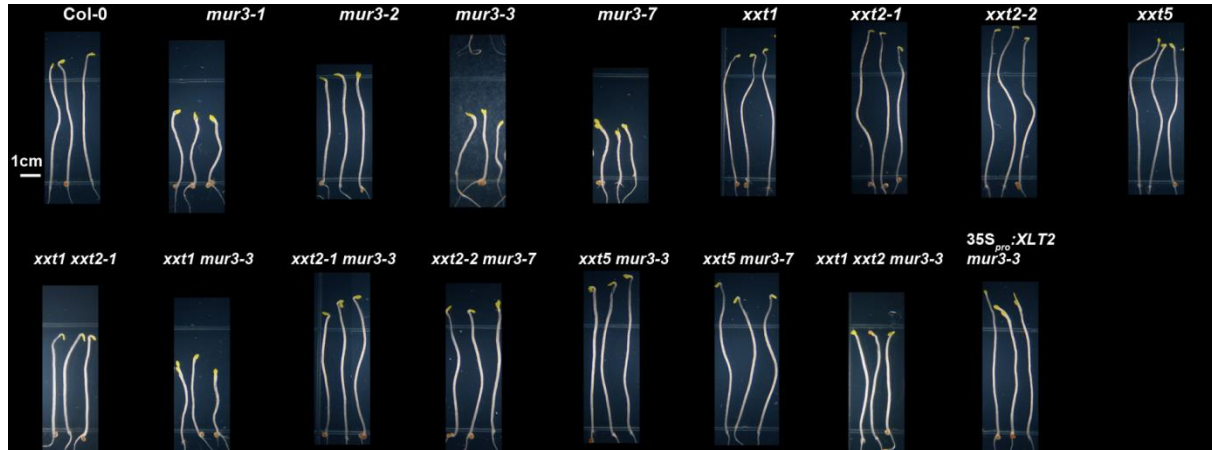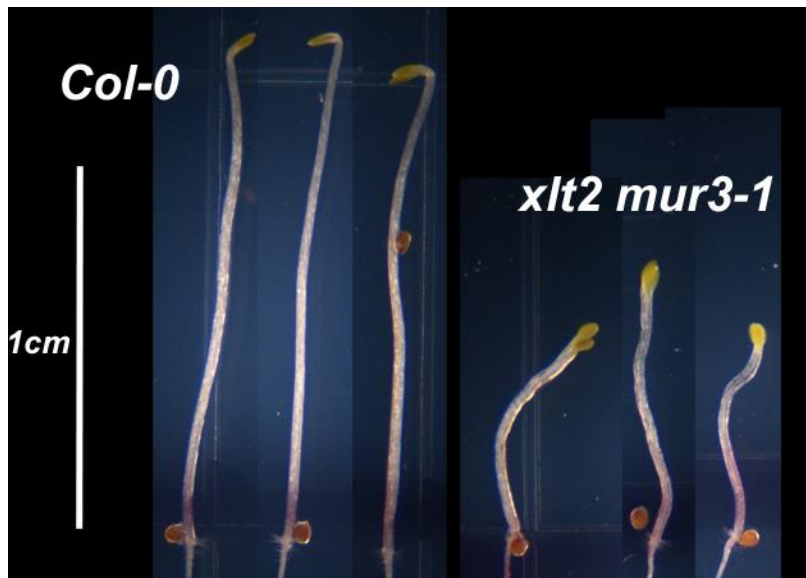

**Supplemental Figure S6.** The effect of the absence of light on the hypocotyl length of seedlings carrying single or combined mutations in genes encoding xylosyltransferases XXT1, XXT2, and XXT5 and galactosyltransferases MUR3 and XLT2. Col-0 and mutant seeds were stratified for 48 h at 4°C. The seeds were then germinated and grown for 5 d at 20°C in the absence of light.

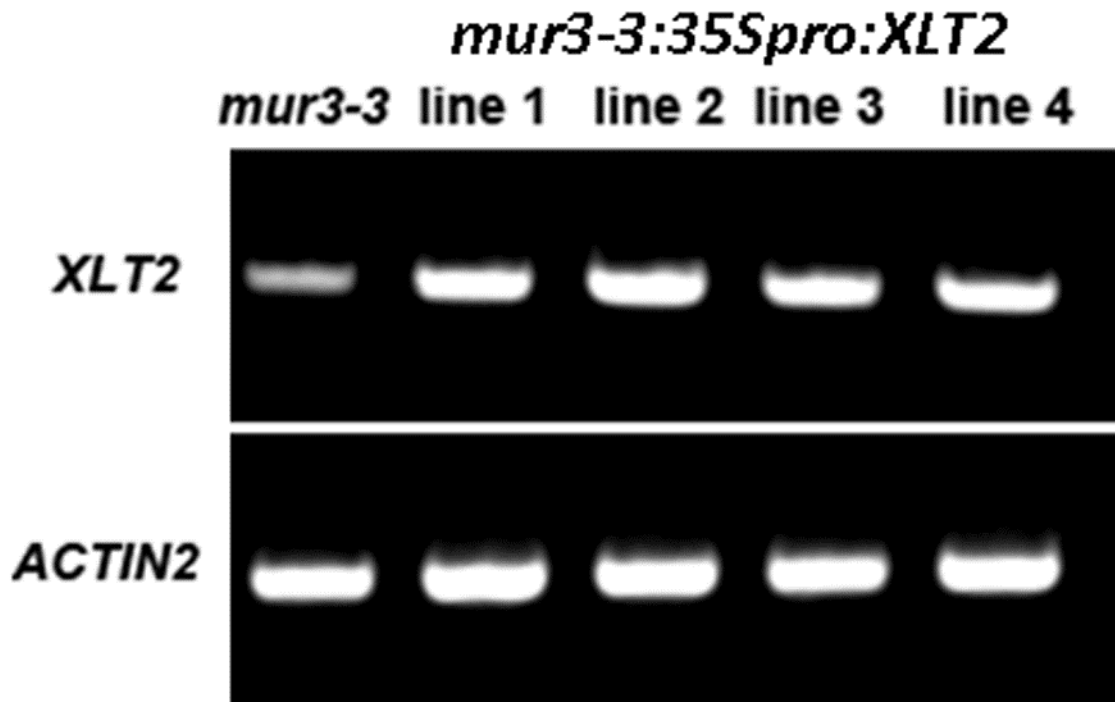

**Supplemental Figure S7.** RT-PCR analyses of *XLT2* transcripts in the rosette leaves of *mur3-3:35Spro:XLT2* plants. Total RNA (2 µg) was used for reverse transcription in a 20 µL RT-PCR reaction. A portion (0.2 µL) of the reverse transcription products was then used in a 20 µL PCR reaction. Thirty cycles of PCR were used. Four independent *mur3-3:35Spro:XLT2* lines were analyzed.



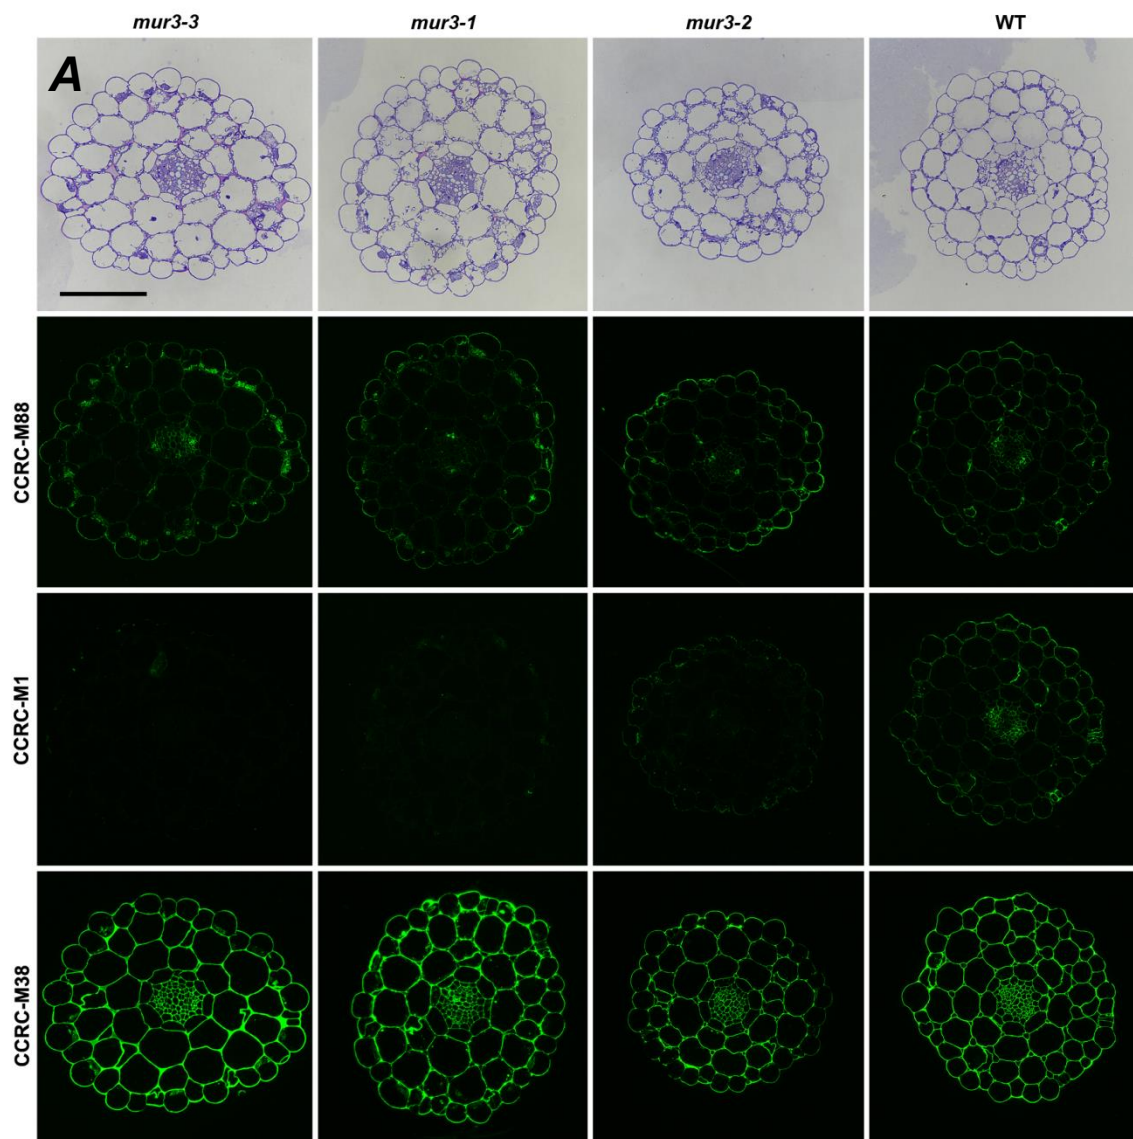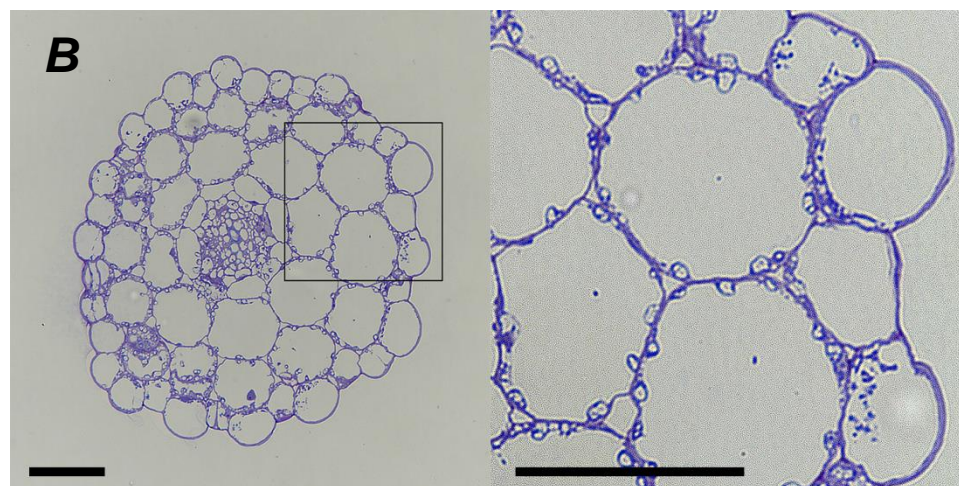

**Supplemental Figure S8.** Intracellular accumulation of cell wall polysaccharides in *mur3* hypocotyls. A, Images of cross sections of the hypocotyls stained with toluidine or labeled with antibodies that recognize xyloglucan (CCRC-M88), fucosylated xyloglucan (CCRC-M1), and de-esterified homogalacturonan (CCRC-M38). Bar is 100  $\mu$ m. B, Cross section of 35SproMUR3:*mur3-3* reveals the absence of intracellular aggregates. Bars are 50  $\mu$ m.

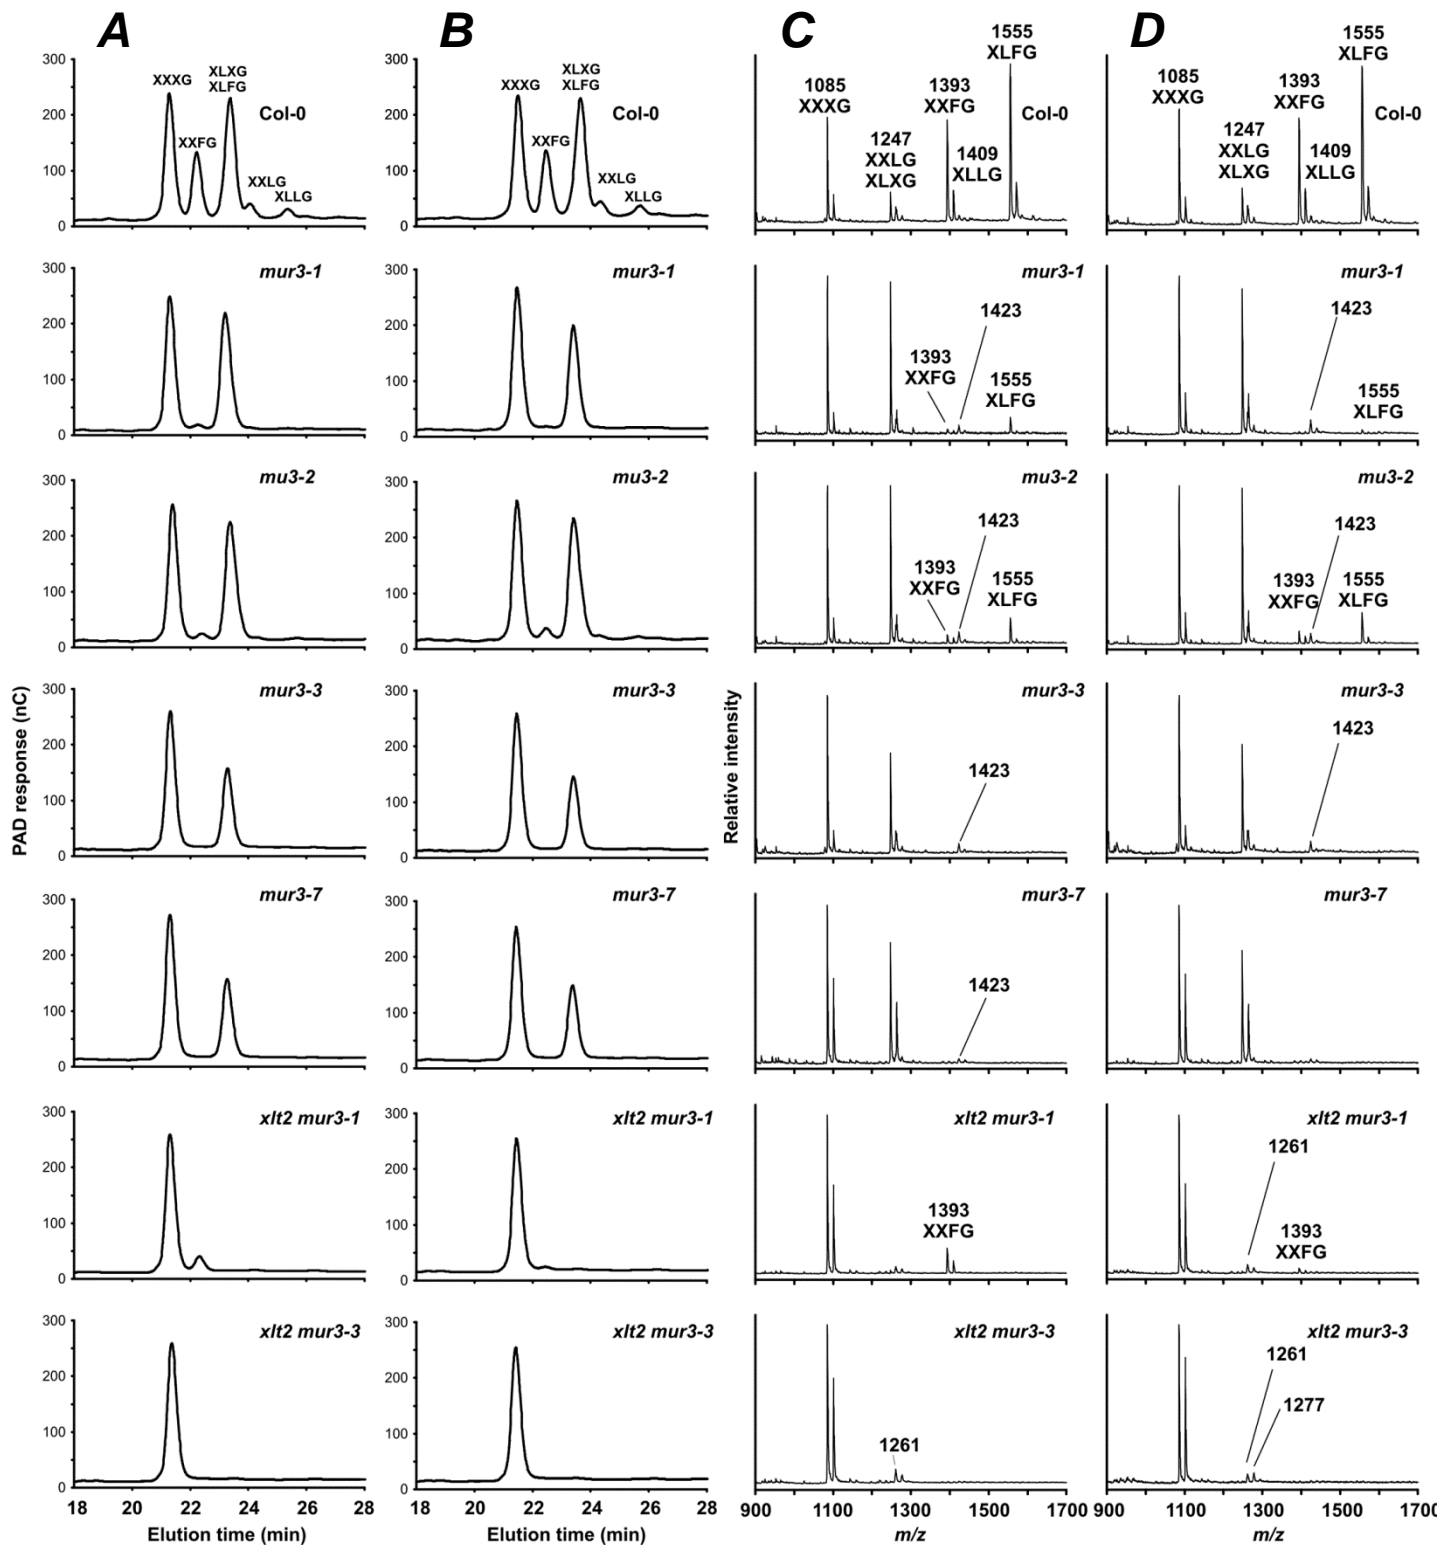

**Supplemental Figure S9.** The MALDI-TOF mass spectra and HPAE-PAD profiles of the XyGOs generated by XEG treatment of the 4 N KOH soluble materials from Col-O and selected mutant plants grown at 19°C and 28°C. A, The HPAE-PAD profiles of the XyGOs generated by XEG treatment of the 4 N KOH soluble materials from plants grown at 19°C. B, The HPAE-PAD profiles of the XyGOs generated by XEG treatment of the 4 N KOH soluble materials from plants grown at 28°C. C, The MALDI-TOF mass spectra of the XyGOs generated by XEG treatment of the 4 N KOH soluble materials from plants grown at 19°C. D, The MALDI-TOF mass spectra of the XyGOs generated by XEG treatment of the 4 N KOH soluble materials from plants grown at 28°C. The ions at  $m/z$  1423, 1261, and 1277 are from the matrix.

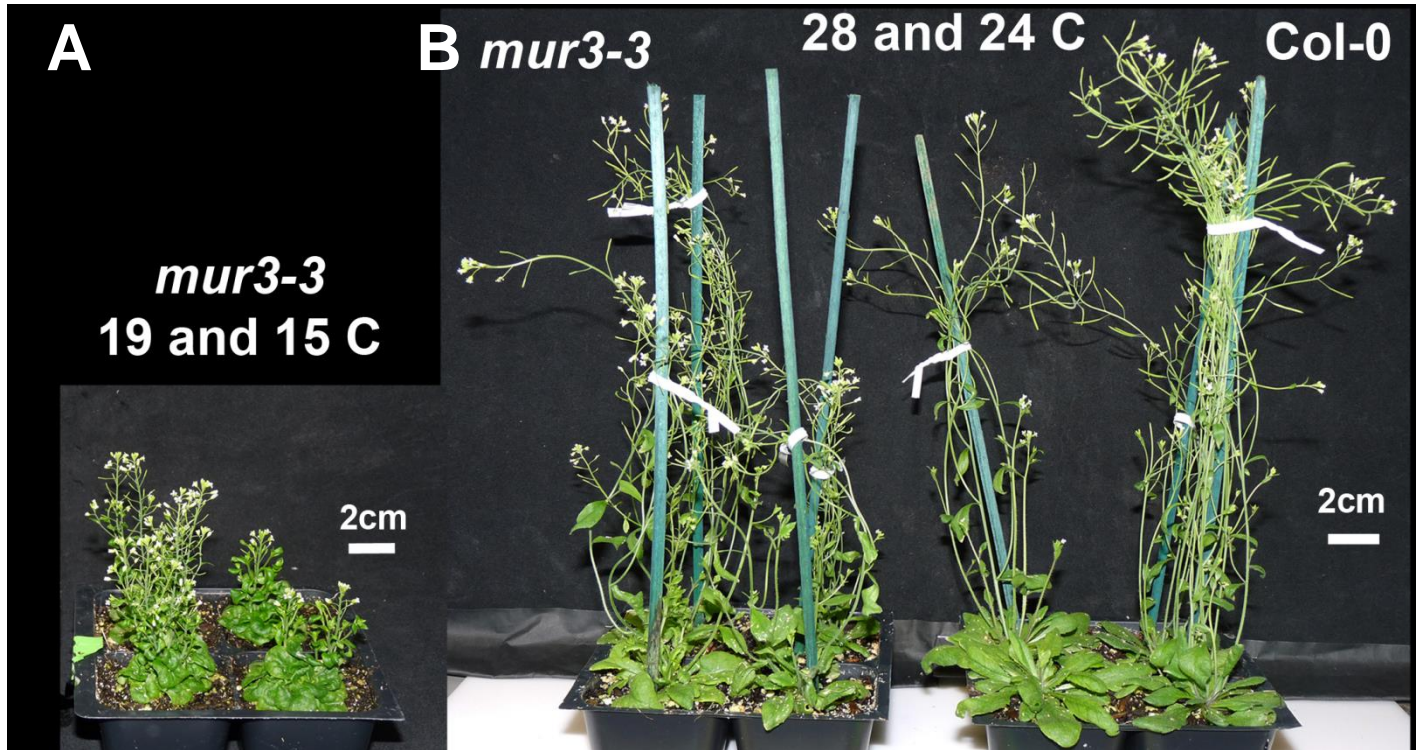

**Supplemental Figure S10.** The effects of temperature on the growth and development of *mur3-3* plants. A, *mur3-3* plants grown with a 14 h light (19°C) and 10 h dark (15°C) cycle, respectively. B, *mur3-3* and Col-0 plants grown with a 14 h light (28°C) and 10 h dark (24°C) cycle.

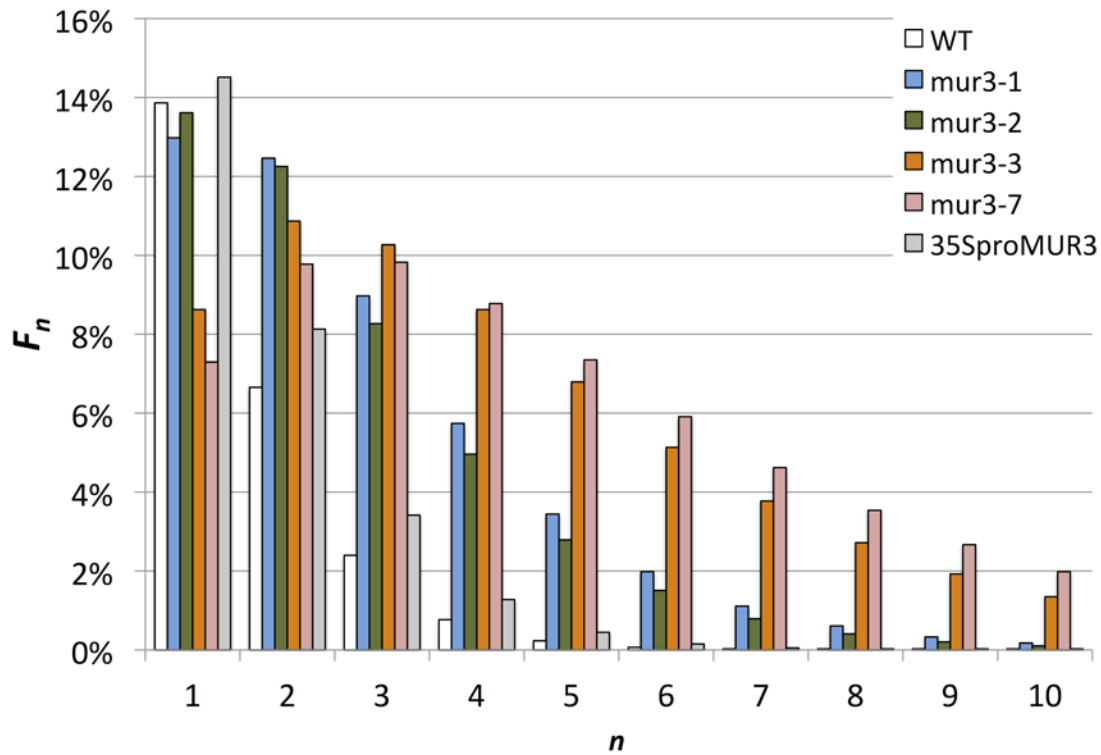

**Supplemental Figure S11.** Abundance of tandemly repeated XXXG domains in the xyloglucan from transgenic plants. The fraction  $F_n$  of each xyloglucan that is composed of domains consisting of exactly  $n$  tandemly repeated XXXG sequences is plotted as a function of  $n$ . This shows that domains consisting of 5 or more tandemly repeated XXXG sequences comprise a much higher proportion of the xyloglucan in *mur3-3* and *mur3-7* plants than in xyloglucan from the other plants shown. Our data thus suggests that the dysfunctional properties of the *mur3-3* and *mur3-7* xyloglucan are due to the aggregation or otherwise aberrant interactions of the large tandemly repeated XXXG domains. See Supplemental Protocol S1 for details of the calculations used to generate this figure.

**Table S1. Sidechain compositions of the xyloglucans isolated from the cell walls of Arabidopsis wild-type, *mur3-1*, *mur3-2*, and *mur3-3* plants.**

| Plant         | Sidechain distribution (X <sub>c</sub> X <sub>b</sub> X <sub>a</sub> G) <sup>*</sup> |                    |                      |                      |                          |
|---------------|--------------------------------------------------------------------------------------|--------------------|----------------------|----------------------|--------------------------|
|               | Xyl <sub>c</sub>                                                                     | Xyl <sub>b+a</sub> | Gal→Xyl <sub>b</sub> | Gal→Xyl <sub>a</sub> | Fuc→Gal→Xyl <sub>a</sub> |
| Wild-type     | 34                                                                                   | 39                 | 8                    | 3                    | 15                       |
| <i>mur3-1</i> | 34                                                                                   | 54                 | 11                   | <1                   | 1                        |
| <i>mur3-2</i> | 34                                                                                   | 51                 | 12                   | 1                    | 2                        |
| <i>mur3-3</i> | 33                                                                                   | 57                 | 9                    | nd <sup>†</sup>      | nd                       |

<sup>\*</sup>The locations of the sidechains were determined by <sup>1</sup>H-NMR spectroscopic analyses of the xyloglucan oligosaccharides generated by XEG treatment of the wild-type and mutant 4 N KOH-soluble xyloglucans. Approximately 30 plants for each line were harvested and pooled for the analyses. The subscript letters indicate the position of the sidechain on the backbone relative to the unsubstituted glucosyl residue (G). The relative proportions of the sidechains were determined by integration of selected anomeric proton resonances in the <sup>1</sup>H-NMR spectra. Thus, in wild-type xyloglucan, terminal Xyl at Xyl<sub>c</sub> and Xyl<sub>b+a</sub> accounts for 34% and 39%, respectively, of the sidechains, terminal Gal at Xyl<sub>b</sub> and terminal Gal at Xyl<sub>a</sub> account for 8% and 3%, respectively, of the sidechains, and 14% of the sidechains are fucosylated. <sup>†</sup>nd, not detected.



**Table S2. The amounts and subunit compositions of the xyloglucan present in the leaf cell walls of wild type and selected *xxt* Arabidopsis mutants.**

| Genotype*          | Xyloglucan<br>(mg/g AIR) <sup>†</sup> | Xyloglucan subunit composition<br>(%) <sup>‡</sup> |                   |        |        |                   |        |
|--------------------|---------------------------------------|----------------------------------------------------|-------------------|--------|--------|-------------------|--------|
|                    |                                       | XXXG                                               | XXLG <sup>§</sup> | XLXG   | XXFG   | XLLG <sup>§</sup> | XLFG   |
| Col-0              | 13 ± 2                                | 25 ± 1                                             | <1                | 9 ± 1  | 24 ± 1 | <1                | 42 ± 3 |
| <i>xxt1</i>        | 11 ± 3                                | 26 ± 2                                             | <1                | 10 ± 1 | 22 ± 1 | <1                | 42 ± 2 |
| <i>xxt2-1</i>      | 8 ± 1                                 | 24 ± 1                                             | <1                | 10 ± 1 | 20 ± 1 | <1                | 46 ± 1 |
| <i>xxt2-2</i>      | 8 ± 2                                 | 22 ± 2                                             | <1                | 8 ± 2  | 22 ± 1 | <1                | 48 ± 1 |
| <i>xxt5</i>        | 7 ± 1                                 | 23 ± 1                                             | <1                | 11 ± 1 | 19 ± 1 | <1                | 47 ± 1 |
| <i>xxt1 xxt2-1</i> | nd <sup>¶</sup>                       | nd                                                 | nd                | nd     | nd     | nd                | nd     |
| <i>xxt1 xxt5</i>   | 5 ± 1                                 | 23 ± 4                                             | <1                | 10 ± 2 | 22 ± 1 | <1                | 45 ± 3 |
| <i>xxt2-1 xxt5</i> | 3 ± 1                                 | 23 ± 1                                             | <1                | 11 ± 1 | 22 ± 1 | <1                | 44 ± 1 |

\*All plants have a wild type phenotype (see Fig. 2). <sup>†</sup>Determined from the amounts of isoprimeverose released by Driselase treatment of the AIR. <sup>‡</sup>Determined from the abundance of the [M + Na]<sup>+</sup> ions in the MALDI-TOF mass spectra. Xyloglucan oligosaccharides were generated by XEG treatment of the 4 N KOH-soluble materials from at least three individual plants. <sup>§</sup>The XXLG and XLLG subunits were detected by HPAEC-PAD. <sup>¶</sup>nd, not detected. The cell walls of the *xxt1 xxt2* double mutant contain no detectable amounts of xyloglucan.

**Table S3. Primers used in this study**

| Primers used for PCR | 5'→3'                              |
|----------------------|------------------------------------|
| <i>MUR3-3 LP</i>     | TGCAAACGAAATTAACATAGGC             |
| <i>MUR3-3 RP</i>     | GAAGAAGAACTGATTGGGGC               |
| <i>MUR3-7 LP</i>     | CAAGGAAATGATCTTTTCCCC              |
| <i>MUR3-7 RP</i>     | ATTGACGGTGATGAAGACCAG              |
| <i>XXT1 LP</i>       | TAAACGTGTGTCCCCTAAACG              |
| <i>XXT1 RB</i>       | AGAGAAATCTCGAGACCGGAC              |
| <i>SAIL LB1</i>      | GCCTTTTCAGAAATGGATAAATAGCCTTGCTTCC |
| <i>XXT2-1 LP</i>     | TAAATTGTTTCCGCGGTACAC              |
| <i>XXT2-1 RP</i>     | AGTCACCAAAGAACACGTGG               |
| <i>XXT2-2 LP</i>     | ACAAAGTGAGTCACCAATGGC              |
| <i>XXT2-2 RP</i>     | GGAGATTCTTCTTCCGGTGAC              |
| <i>XXT5 LP</i>       | GATCATCTGCCTCAAAGCTG               |
| <i>XXT5 RP</i>       | ACAAAGTTGATGGTCGCAAAC              |
| <i>GABI 8760</i>     | GGGCTACACTGAATTGGTAGCTC            |
| <i>XLT2 OX F</i>     | GGTACCTATGCTTCTGTCTCAAATCCTTC      |
| <i>XLT2 OX R</i>     | TCTAGACCAATCATCATCTCCATTTGTACC     |
| <i>P1300 R</i>       | CCAGACAAGTTGGTAATGGTAG             |
| Primers for RT-PCR   |                                    |
| <i>MUR3 F</i>        | CCAAGGGTTTCTATGAGGCGTC             |
| <i>MUR3 R</i>        | GAAGAACGGGTCCCACACATGG             |
| <i>XXT1 F</i>        | ATGATAGAGAAGTCTATAGGAGCGCA         |
| <i>XXT1 R</i>        | CGCAAATTAAGATACAAACAA              |
| <i>XXT2 F</i>        | ATGATTGAGAGGTGTTTAGGAGCTTA         |
| <i>XXT2 R</i>        | CCTAAACGCAAACCGATTC                |
| <i>XXT5 F</i>        | GATCATCTGCCTCAAAGCTG               |
| <i>XXT5 R</i>        | ACAAAGTTGATGGTCGCAAAC              |
| <i>XLT2 F</i>        | TTGGATCCGGAATCAGCTAC               |
| <i>XLT2 R</i>        | AATCCACCGTCCGACACTTC               |
| <i>Actin2 F</i>      | TGGTCGTACAACCGGTATTGTGC            |
| <i>Actin2 R</i>      | TCATACGGTCAGCGATACCTGAG            |

Table S4. **Monoclonal antibodies used for glycome profiling**

| Xyloglucan*           | Fucosylated xyloglucan <sup>†</sup> |
|-----------------------|-------------------------------------|
| CCRC-M54 <sup>‡</sup> | CCRC-M102                           |
| CCRC-M48              | CCRC-M39                            |
| CCRC-M49              | CCRC-M106                           |
| CCRC-M96              | CCRC-M84                            |
| CCRC-M50              | CCRC-M1                             |
| CCRC-M51              |                                     |
| CCRC-M53              |                                     |
| CCRC-M100             |                                     |
| CCRC-M103             |                                     |
| CCRC-M58              |                                     |
| CCRC-M86              |                                     |
| CCRC-M55              |                                     |
| CCRC-M52              |                                     |
| CCRC-M99              |                                     |
| CCRC-M95              |                                     |
| CCRC-M101             |                                     |
| CCRC-M104             |                                     |
| CCRC-M89              |                                     |
| CCRC-M93              |                                     |
| CCRC-M87              |                                     |
| CCRC-M88              |                                     |
| CCRC-M57              |                                     |
| CCRC-M90              |                                     |

\*mAbs bind to xyloglucan irrespective of the presence or absence of fucosylated side chains. <sup>†</sup>mAbs bind only to xyloglucan that contains fucosylated side chains. <sup>‡</sup>For additional information about these antibodies see <http://www.wallmabdb.net>.



## Supplemental Protocol S1

### Calculating the Fraction of a Polysaccharide that is composed of Domains Containing $n$ or more Tandemly Repeated Copies of a Sequence.

An internal domain consisting of exactly  $n$  (no more, no less) tandem copies of the sequence **S** (where **S** is a defined subsequence such as XXXG) must have the sequence [NOT **S**] at each end. If the probability of having subsequence **S** at a randomly chosen site in a randomly chosen polymer is  $P$ , then the probability of a domain [NOT **S**]-**S** <sub>$n$</sub> -[NOT **S**] starting at that site is calculated by multiplying the probability of  $n + 2$  required independent events.

$$\text{Hence, } P_n = P^n (1 - P)^2$$

Note that this does not account for domains at the end of the polymer, which do not contribute significantly to the probability for long polysaccharides.

Domains with exactly  $n$  tandem copies of **S** constitute a specific fraction  $F_n$  of the total sequence of the polymers in the sample. The value of  $F_n$  is calculated as the probability  $P_n$  of the **S** <sub>$n$</sub>  domain multiplied by the length  $n$  (number of tandem repeats) of the sequence. That is,

$$F_n = nP_n = nP^n (1 - P)^2$$

As an example, the fractions  $F_n$  of the polymer composed of domains with exactly  $n$  tandemly repeated **S** subsequences for  $P = 0.5$  and  $P = 0.01$  are shown below. When all values of  $n$  are considered, the sum of  $F_n$  values equals  $P$ , which, as expected corresponds to the fraction of the polymer composed of **S** subsequences in any context. This can be easily proven for any  $P < 1$  by expressing the sum as a convergent geometric series:

$$\sum_1^{\infty} nP^n (1 - P)^2 = (1 - P)^2 \sum_1^{\infty} nP^n = (1 - P)^2 \frac{P}{(1 - P)^2} = P$$

The fractions  $F_n$  of the polymer composed of domains with exactly  $n$  tandemly repeated **S** subsequences for  $P = 0.5$  and  $P = 0.01$ :

| $n$   | $F_n(P=0.5)$ | $F_n(P=0.01)$ |
|-------|--------------|---------------|
| 1     | 12.5%        | 0.98%         |
| 2     | 12.5%        | 0.02%         |
| 3     | 9.38%        | 0.00%         |
| 4     | 6.25%        | 0.00%         |
| 5     | 3.91%        | 0.00%         |
| 6     | 2.34%        | 0.00%         |
| 7     | 1.37%        | 0.00%         |
| 8     | 0.78%        | 0.00%         |
| 9     | 0.44%        | 0.00%         |
| 10    | 0.24%        | 0.00%         |
| 11    | 0.13%        | 0.00%         |
| 12    | 0.07%        | 0.00%         |
| Total | 49.91%       | 1.00%         |

A probability analysis using the abundance of XXXG subunits in the XyG from *mur3-3* (63%), *mur3-7* (73%) wild type (25%), *mur3-1* (48%), *mur3-2* (47%), and 35SproMUR3:*mur3-3* (29%) plants predicts that domains consisting of 5 or more tandemly repeated XXXG sequences comprise a much higher proportion of the XyG in *mur3-3* and *mur3-7* plants than in XyG from the other plants (see Supplemental Fig. S11).
